# Supplementary material
Source: publisher figshare collection journal article supplement (https://sage.figshare.com/ndownloader/files/24745414)
Supplement: Supplementary file 1 [file 24745414]

Archive with 4 entries (4 files):
- How To Use siMPle.pdf
- ASP-19-0288.R2_Primpke_Supplemental_Material.pdf
- ESM1.csv
- ESM2_revised.xlsx
