# Supplementary material
Source: publisher figshare collection journal article supplement (https://sage.figshare.com/ndownloader/files/24745414)
Supplement: Supplementary file 1 [file 24745414 › ASP-19-0288.R2_Primpke_Supplemental_Material.pdf]

## Supplemental Material

# **Toward the Systematic Identification of Microplastics in the Environment: Evaluation of a New Independent Software Tool (siMPle) for Spectroscopic Analysis**

Sebastian Primpke<sup>1,\*</sup>, Richard K. Cross<sup>2</sup>, Svenja M. Mintenig<sup>3</sup>, Marta Simon<sup>4</sup>, Alvise Vianello<sup>4</sup>, Gunnar Gerdt<sup>1</sup>, and Jes Vollertsen<sup>4,\*</sup>

<sup>1</sup> Alfred Wegener Institute, Helmholtz Centre for Polar and Marine Research, Biologische Anstalt Helgoland, Kurpromenade 201, 27498 Helgoland

<sup>2</sup> Pollution Science Area, UK Centre for Ecology & Hydrology, Maclean Building, Benson Lane, Crowmarsh Gifford, Wallingford, Oxfordshire OX10 8BB, UK

<sup>3</sup> Copernicus Institute of Sustainable Development, Utrecht University, P.O. Box 80115, 3508 TC Utrecht, The Netherlands,

<sup>4</sup> Aalborg University, Department of the Built Environment, Thomas Manns Vej 23, 9220 Aalborg Øst, Denmark

Corresponding authors emails: Sebastian.Primpke@awi.de; jv@civil.aau.dk

### **Paragraph S1: File format for Single Spectra Correlation**

The file must be saved as .csv file containing the entries WaveNumber (in  $\text{cm}^{-1}$ ) and Spectrum (absorbance value at the assigned WaveNumber) separated by a “,”. Please keep in mind that the format is currently case sensitive. Afterwards follows the spectrum starting from the lowest wavenumber and the measured absorbance for (FTIR) or counts (for Raman).

Example:

WaveNumber,Spectrum

1249.5058,0

1251.43405,0.00269

1253.3623,0.02026

1255.29055,0.03502

etc.

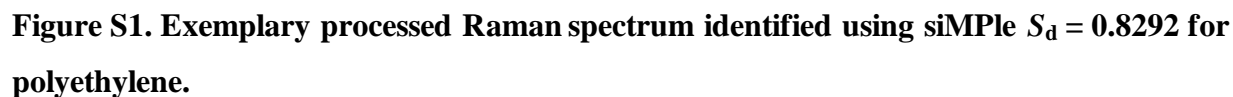

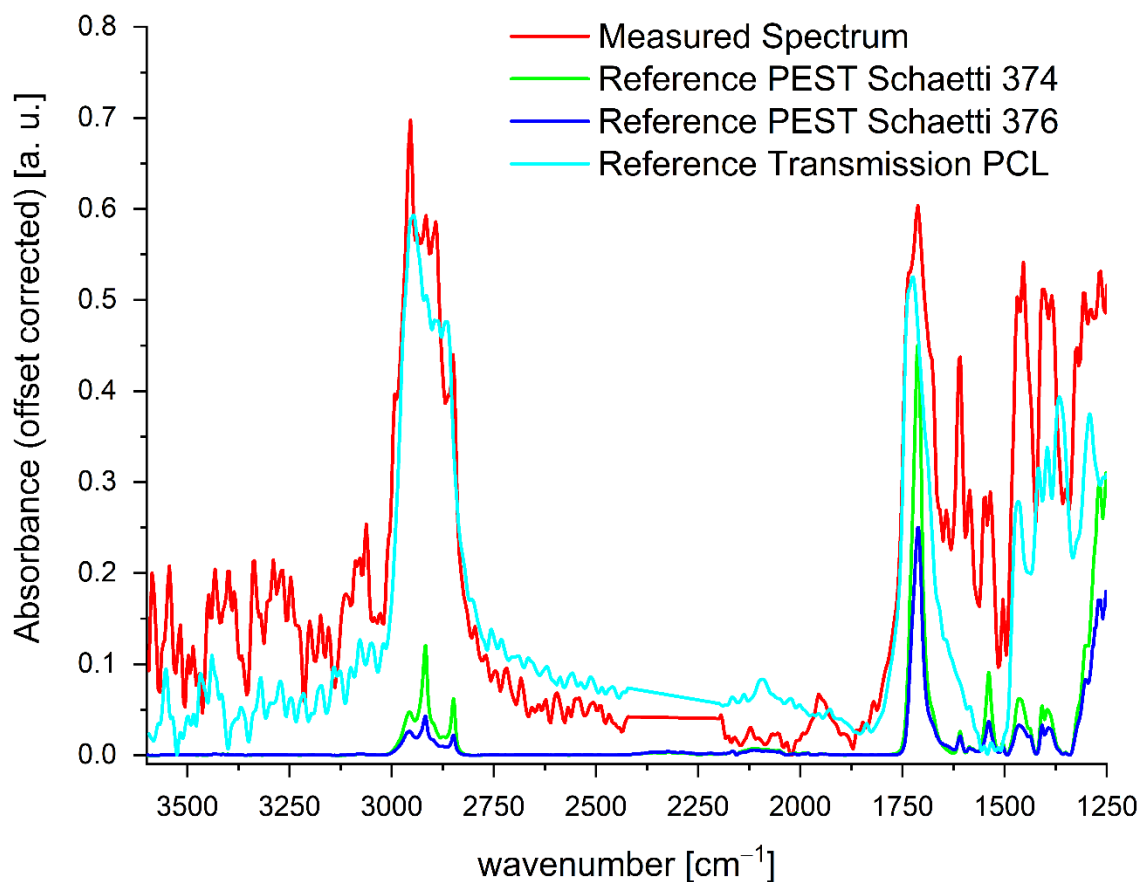

**Figure S2. Comparison between a measured spectrum assigned to polycaprolactone (PCL), the polyester (PEST) added to the sample from the manufacturer Schaetti and the spectrum of PCL causing the assignment measured in transmission.**

**Table S1. Spectrum based polymer type identification rates using OPUS and siMPle on sample RefEnv1.**

|              | RefEnv1 | RefEnv1 | RefEnv2 | RefEnv2 |
|--------------|---------|---------|---------|---------|
| Polymer type | OPUS    | siMPle  | OPUS    | siMPle* |

|                                 |      |       |       |        |
|---------------------------------|------|-------|-------|--------|
| Polyethylene                    | 45   | 46    | 7114  | 7579   |
| Polyethylene oxidized           | 0    | 0     | 7     | 0      |
| Polyethylene-chlorinated        | 0    | 0     | 47    | 93     |
| Polypropylene                   | 753  | 794   | 54934 | 54965  |
| Polystyrene                     | 152  | 170   | 4     | 3      |
| Polycarbonate                   | 1    | 2     | 2     | 0      |
| Polyamide                       | 33   | 33    | 65    | 80     |
| Polyvinylchloride               | 30   | 32    | 1     | 6      |
| Cellulose chemical modified     | 0    | 0     | 163   | 163    |
| Polyester                       | 4    | 4     | 179   | 198    |
| Acrylates/polyurethanes/varnish | 430  | 450   | 3001  | 3860   |
| Animal fur/natural polyamides   | 126  | 180   | 685   | 1151   |
| Plant fibers/ cellulose         | 4520 | 13750 | 82563 | 141833 |
| Sand                            | 10   | 1     | 7348  | 6808   |
| Polysulfone                     | 495  | 508   | 2     | 1      |
| Polychloroprene                 | 1    | 0     | 401   | 105    |
| Chitin                          | 10   | 7     | 3756  | 4382   |
| Polycaprolactone                | 0    | 0     | 180   | 285    |
| Ethylene-Vinyl-Acetate          | 1    | 2     | 522   | 334    |
| Polyoxymethylene                | 3    | 1     | 12    | 20     |
| Rubber type 1                   | 0    | 1     | 26    | 0      |
| Charcoal                        | 0    | 1     | 1     | 1      |
| Coal                            | 0    | 11    | 1     | 6      |
| Rubber type 3                   | 112  | 302   | 683   | 1067   |

\*Please note that the export for siMPle could only be performed for a fieldsize of 85\*85 FPA fields by combining 2 x 2 FPA fields to a larger one, an export of each field was not possible because the Marco stop working due to unknown reasons. The dataset misses 42910 spectra and mainly PP assignments as it was part of the outer region also visualized in Figure XY.

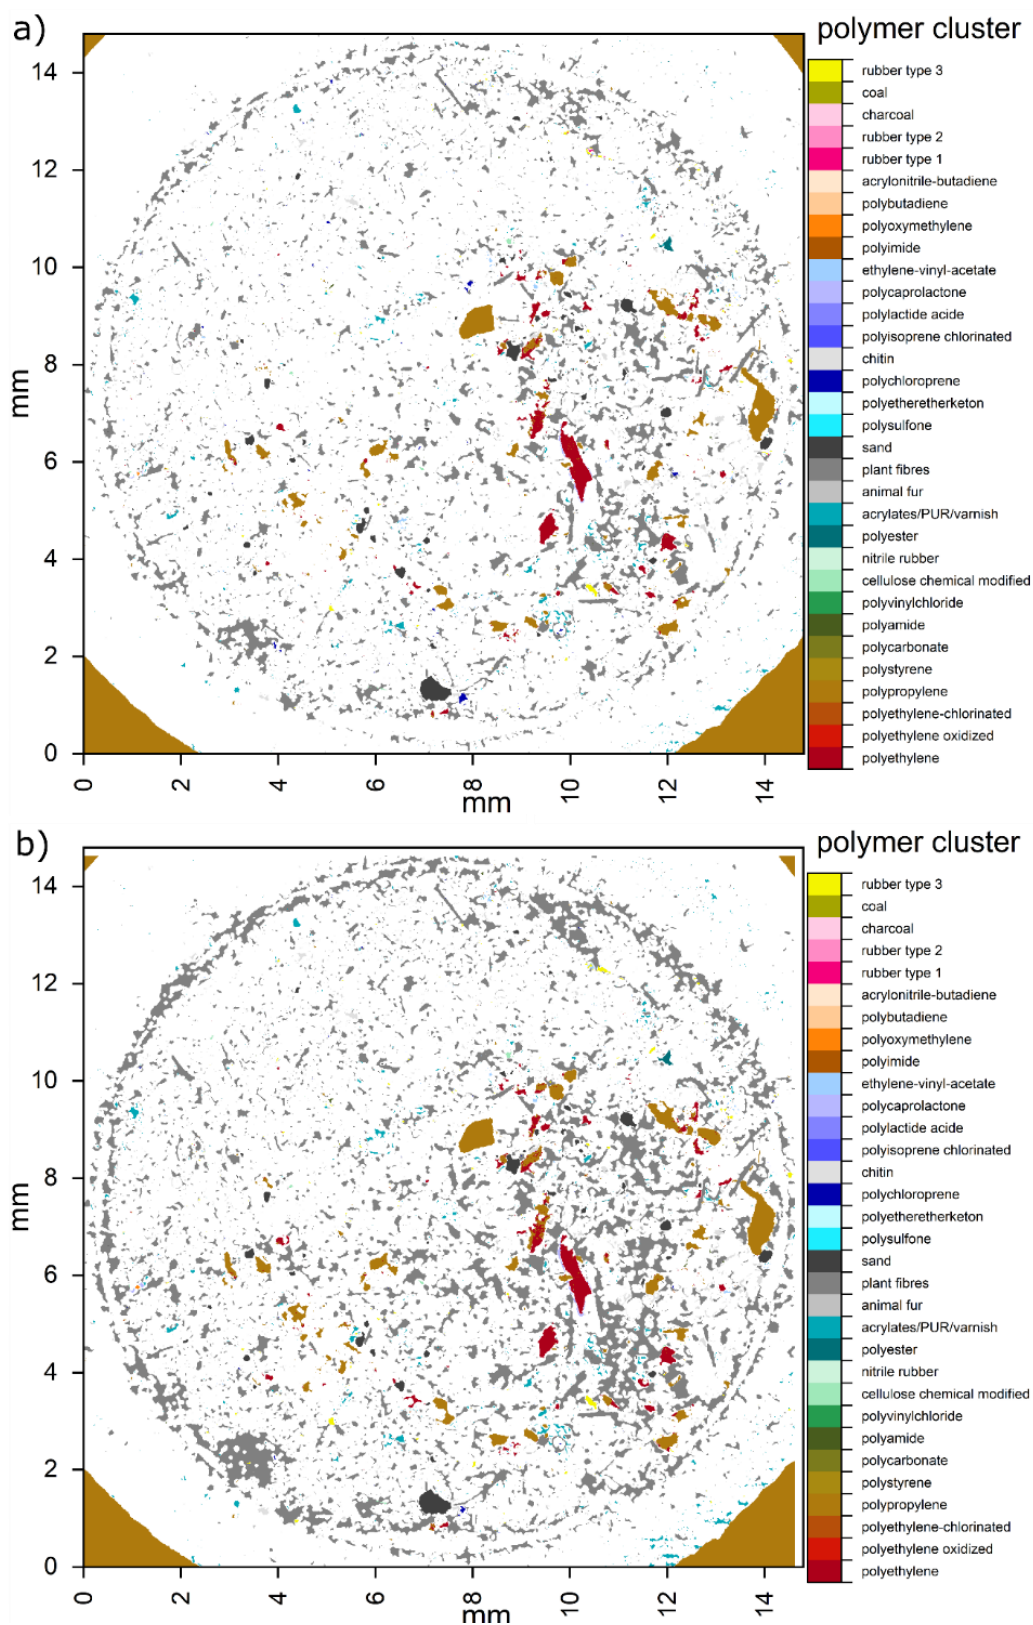

**Figure S3. False color overview images from the analysis of the sample RefEnv2 via OPUS (a) and siMPle (b). Please note that the export for siMPle could only be performed for**

RefEnv2 (field size of 85\*85 FPA fields) by combining 2 x 2 FPA fields to a larger one, an export of each field was not possible because the Marco stop working due to unknown reasons. The dataset misses 42910 spectra visible as white area at the top and right side.

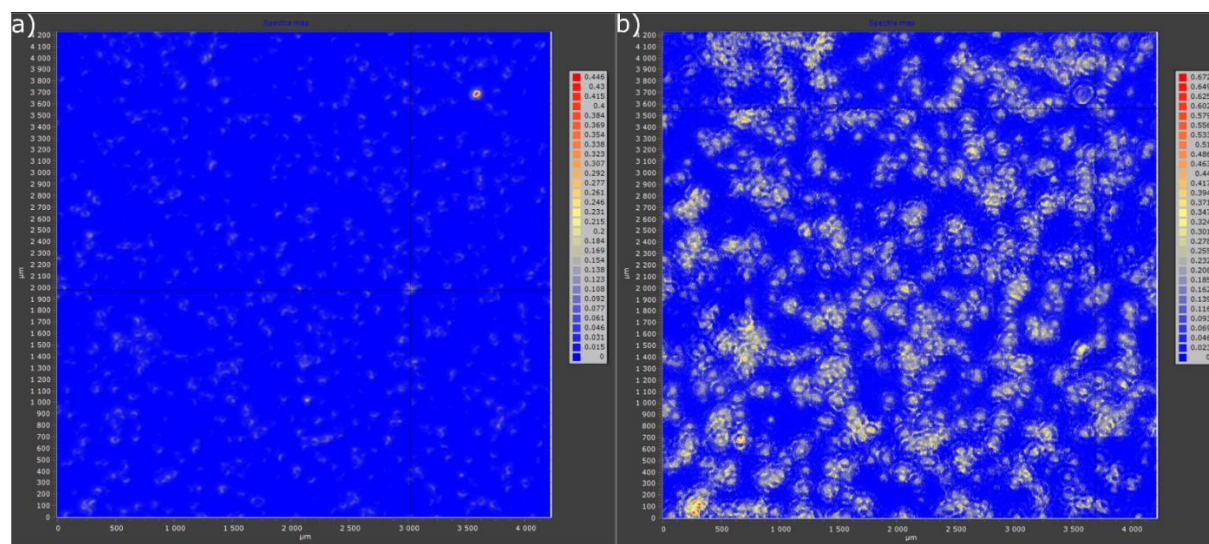

**Figure S4.** Algae cells (*Raphidocelis subcapitata*) placed on CaF<sub>2</sub> measured using the Agilent system. (a) General Heatmap based on the highest Peak in the spectrum. (b) Visualization of the particles using spectral comparison against the database entry algae *fucus serratus*.
