# Supplementary material
Source: publisher figshare collection journal article supplement (https://sage.figshare.com/ndownloader/files/24745414)
Supplement: Supplementary file 1 [file 24745414 › ESM1.csv]

WaveNumber	Spectrum
1249.5058	0
1251.43405	0.00269
1253.3623	0.02026
1255.29055	0.03502
1257.2188	0.03603
1259.14705	0.02861
1261.0753	0.02516
1263.00355	0.02296
1264.9318	0.01447
1266.86005	0.00613
1268.7883	0.00414
1270.71655	0.00316
1272.6448	0
1274.57305	0.00034
1276.5013	0.0039
1278.42955	0.00739
1280.3578	0.00987
1282.28605	0.01225
1284.2143	0.0142
1286.14254	0.01606
1288.07079	0.01407
1289.99904	0.01438
1291.92729	0.01551
1293.85554	0.01789
1295.78379	0.02149
1297.71204	0.02617
1299.64029	0.03248
1301.56854	0.03839
1303.49679	0.04171
1305.42504	0.04282
1307.35329	0.04408
1309.28154	0.0467
1311.20979	0.05042
1313.13804	0.05615
1315.06629	0.06253
1316.99454	0.06718
1318.92279	0.07204
1320.85104	0.07841
1322.77929	0.08411
1324.70754	0.08894
1326.63579	0.09383
1328.56404	0.09826
1330.49229	0.10192
1332.42054	0.10409
1334.34879	0.10304
1336.27704	0.09711
1338.20529	0.08606
1340.13354	0.07205
1342.06179	0.05904
1343.99004	0.05035
1345.91829	0.04671
1347.84654	0.04731
1349.77478	0.05022
1351.70303	0.05237
1353.63128	0.0518
1355.55953	0.04864
1357.48778	0.04463
1359.41603	0.04108
1361.34428	0.03726
1363.27253	0.03356
1365.20078	0.03216
1367.12903	0.03139
1369.05728	0.02807
1370.98553	0.02369
1372.91378	0.02219
1374.84203	0.02369
1376.77028	0.02394
1378.69853	0.02235
1380.62678	0.02153
1382.55503	0.02052
1384.48328	0.0177
1386.41153	0.01409
1388.33978	0.01066
1390.26803	0.00791
1392.19628	0.00674
1394.12453	0.00733
1396.05278	0.00818
1397.98103	0.0092
1399.90928	0.0103
1401.83753	0.01156
1403.76578	0.01427
1405.69403	0.01959
1407.62228	0.02773
1409.55053	0.03869
1411.47878	0.05098
1413.40702	0.06306
1415.33527	0.07525
1417.26352	0.08827
1419.19177	0.10381
1421.12002	0.12201
1423.04827	0.14208
1424.97652	0.15904
1426.90477	0.1635
1428.83302	0.15806
1430.76127	0.15379
1432.68952	0.15322
1434.61777	0.15031
1436.54602	0.13806
1438.47427	0.11816
1440.40252	0.09963
1442.33077	0.08244
1444.25902	0.06483
1446.18727	0.04885
1448.11552	0.03776
1450.04377	0.03087
1451.97202	0.02597
1453.90027	0.02321
1455.82852	0.02069
1457.75677	0.01391
1459.68502	0.00765
1461.61327	0.0066
1463.54152	0.00718
1465.46977	0.00671
1467.39802	0.00703
1469.32627	0.00849
1471.25452	0.00986
1473.18277	0.00967
1475.11101	0.00729
1477.03926	0.005
1478.96751	0.00461
1480.89576	0.00652
1482.82401	0.00824
1484.75226	0.00665
1486.68051	0.00414
1488.60876	0.00514
1490.53701	0.00763
1492.46526	0.00789
1494.39351	0.00679
1496.32176	0.00621
1498.25001	0.00713
1500.17826	0.00789
1502.10651	0.00908
1504.03476	0.01217
1505.96301	0.01519
1507.89126	0.014
1509.81951	0.01004
1511.74776	0.00587
1513.67601	0.00279
1515.60426	0.0015
1517.53251	0.00162
1519.46076	0.00357
1521.38901	0.00602
1523.31726	0.00692
1525.24551	0.00697
1527.17376	0.00915
1529.10201	0.01228
1531.03026	0.01275
1532.95851	0.01088
1534.88676	0.01005
1536.81501	0.00971
1538.74325	0.00805
1540.6715	0.00957
1542.59975	0.01212
1544.528	0.00786
1546.45625	0.00328
1548.3845	0.00447
1550.31275	0.00747
1552.241	0.00583
1554.16925	0.00134
1556.0975	0.00049
1558.02575	0.00421
1559.954	0.00477
1561.88225	0.00328
1563.8105	0.0046
1565.73875	0.00589
1567.667	0.00555
1569.59525	0.00627
1571.5235	0.00738
1573.45175	0.0061
1575.38	0.00314
1577.30825	0.00265
1579.2365	0.00402
1581.16475	0.00375
1583.093	0.00363
1585.02125	0.00585
1586.9495	0.00815
1588.87775	0.00805
1590.806	0.00679
1592.73425	0.00625
1594.6625	0.00565
1596.59075	0.00505
1598.519	0.00629
1600.44724	0.00856
1602.37549	0.00968
1604.30374	0.00904
1606.23199	0.0084
1608.16024	0.00929
1610.08849	0.00877
1612.01674	0.00607
1613.94499	0.00531
1615.87324	0.00666
1617.80149	0.00737
1619.72974	0.00817
1621.65799	0.00865
1623.58624	0.0065
1625.51449	0.00268
1627.44274	0.0001
1629.37099	0
1631.29924	0.00093
1633.22749	0.00135
1635.15574	0.00245
1637.08399	0.00477
1639.01224	0.00586
1640.94049	0.00606
1642.86874	0.00639
1644.79699	0.00705
1646.72524	0.00815
1648.65349	0.00872
1650.58174	0.00728
1652.50999	0.00336
1654.43824	0.00174
1656.36649	0.0032
1658.29474	0.00469
1660.22299	0.00677
1662.15124	0.00842
1664.07948	0.00849
1666.00773	0.00932
1667.93598	0.01142
1669.86423	0.01226
1671.79248	0.01064
1673.72073	0.00773
1675.64898	0.00528
1677.57723	0.00522
1679.50548	0.00655
1681.43373	0.00751
1683.36198	0.00664
1685.29023	0.0043
1687.21848	0.00378
1689.14673	0.00429
1691.07498	0.00395
1693.00323	0.0038
1694.93148	0.00486
1696.85973	0.00523
1698.78798	0.00435
1700.71623	0.00374
1702.64448	0.00343
1704.57273	0.0034
1706.50098	0.00348
1708.42923	0.00329
1710.35748	0.0032
1712.28573	0.00352
1714.21398	0.00369
1716.14223	0.00275
1718.07048	0.00136
1719.99873	0.0013
1721.92698	0.00201
1723.85523	0.00268
1725.78347	0.00356
1727.71172	0.00551
1729.63997	0.00813
1731.56822	0.01021
1733.49647	0.01134
1735.42472	0.01077
1737.35297	0.00884
1739.28122	0.00701
1741.20947	0.00698
1743.13772	0.00802
1745.06597	0.00794
1746.99422	0.00728
1748.92247	0.0067
1750.85072	0.00511
1752.77897	0.00356
1754.70722	0.00304
1756.63547	0.00246
1758.56372	0.00177
1760.49197	0.00168
1762.42022	0.00182
1764.34847	0.00187
1766.27672	0.00212
1768.20497	0.00294
1770.13322	0.00415
1772.06147	0.00448
1773.98972	0.00283
1775.91797	0.00064
1777.84622	0
1779.77447	0.00098
1781.70272	0.00212
1783.63097	0.00306
1785.55922	0.00383
1787.48747	0.00409
1789.41571	0.00402
1791.34396	0.00413
1793.27221	0.00477
1795.20046	0.00519
1797.12871	0.00519
1799.05696	0.00537
1800.98521	0.00528
1802.91346	0.00458
1804.84171	0.00401
1806.76996	0.00354
1808.69821	0.00299
1810.62646	0.00301
1812.55471	0.00311
1814.48296	0.00221
1816.41121	0.00123
1818.33946	0.00141
1820.26771	0.00214
1822.19596	0.00244
1824.12421	0.00267
1826.05246	0.00334
1827.98071	0.00362
1829.90896	0.00276
1831.83721	0.00174
1833.76546	0.00194
1835.69371	0.00306
1837.62196	0.00384
1839.55021	0.00414
1841.47846	0.00445
1843.40671	0.00439
1845.33496	0.00418
1847.26321	0.00478
1849.19146	0.00568
1851.1197	0.00529
1853.04795	0.00348
1854.9762	0.00247
1856.90445	0.00328
1858.8327	0.00434
1860.76095	0.00465
1862.6892	0.00463
1864.61745	0.00497
1866.5457	0.00584
1868.47395	0.00574
1870.4022	0.00418
1872.33045	0.00295
1874.2587	0.0025
1876.18695	0.00259
1878.1152	0.00291
1880.04345	0.00319
1881.9717	0.00339
1883.89995	0.00284
1885.8282	0.0017
1887.75645	0.00101
1889.6847	0.0011
1891.61295	0.00168
1893.5412	0.00257
1895.46945	0.00344
1897.3977	0.00322
1899.32595	0.00166
1901.2542	0.00023
1903.18245	0
1905.1107	0.0003
1907.03895	0.00051
1908.9672	0.00107
1910.89545	0.00184
1912.8237	0.00237
1914.75194	0.00285
1916.68019	0.00316
1918.60844	0.00302
1920.53669	0.00257
1922.46494	0.00258
1924.39319	0.00359
1926.32144	0.00488
1928.24969	0.00544
1930.17794	0.00518
1932.10619	0.00492
1934.03444	0.00524
1935.96269	0.00554
1937.89094	0.00517
1939.81919	0.0047
1941.74744	0.00473
1943.67569	0.00472
1945.60394	0.00429
1947.53219	0.00339
1949.46044	0.00186
1951.38869	0.00032
1953.31694	0
1955.24519	0.00088
1957.17344	0.00158
1959.10169	0.00169
1961.02994	0.00219
1962.95819	0.00284
1964.88644	0.00263
1966.81469	0.00179
1968.74294	0.00115
1970.67119	0.00119
1972.59944	0.00242
1974.52769	0.00448
1976.45593	0.00639
1978.38418	0.00792
1980.31243	0.00876
1982.24068	0.00861
1984.16893	0.00845
1986.09718	0.00896
1988.02543	0.00911
1989.95368	0.00801
1991.88193	0.00688
1993.81018	0.00671
1995.73843	0.0068
1997.66668	0.00636
1999.59493	0.00565
2001.52318	0.00522
2003.45143	0.00464
2005.37968	0.00376
2007.30793	0.00325
2009.23618	0.00315
2011.16443	0.00316
2013.09268	0.00349
2015.02093	0.00379
2016.94918	0.0032
2018.87743	0.00245
2020.80568	0.0021
2022.73393	0.00196
2024.66218	0.00279
2026.59043	0.00405
2028.51868	0.00444
2030.44693	0.0046
2032.37518	0.00502
2034.30343	0.00549
2036.23168	0.00653
2038.15993	0.00804
2040.08817	0.00897
2042.01642	0.00919
2043.94467	0.00924
2045.87292	0.00928
2047.80117	0.00938
2049.72942	0.00953
2051.65767	0.00936
2053.58592	0.00784
2055.51417	0.00514
2057.44242	0.00338
2059.37067	0.00305
2061.29892	0.00282
2063.22717	0.00225
2065.15542	0.00167
2067.08367	0.00145
2069.01192	0.00191
2070.94017	0.00256
2072.86842	0.00242
2074.79667	0.00159
2076.72492	0.00082
2078.65317	0.00048
2080.58142	0.00074
2082.50967	0.00131
2084.43792	0.00213
2086.36617	0.00321
2088.29442	0.00358
2090.22267	0.00274
2092.15092	0.00196
2094.07917	0.00216
2096.00742	0.00267
2097.93567	0.00318
2099.86392	0.00366
2101.79216	0.00339
2103.72041	0.00269
2105.64866	0.00265
2107.57691	0.00281
2109.50516	0.00234
2111.43341	0.00167
2113.36166	0.00111
2115.28991	0.00044
2117.21816	0.00004
2119.14641	0.00017
2121.07466	0.0007
2123.00291	0.0017
2124.93116	0.00249
2126.85941	0.0022
2128.78766	0.00115
2130.71591	0.00022
2132.64416	0
2134.57241	0.00042
2136.50066	0.00084
2138.42891	0.00075
2140.35716	0.00039
2142.28541	0.00008
2144.21366	0.00001
2146.14191	0.00021
2148.07016	0.00055
2149.99841	0.00096
2151.92666	0.00129
2153.85491	0.00117
2155.78316	0.00064
2157.71141	0.0001
2159.63966	0
2161.56791	0.0005
2163.49616	0.00147
2165.4244	0.00233
2167.35265	0.00259
2169.2809	0.00227
2171.20915	0.00241
2173.1374	0.00352
2175.06565	0.00438
2176.9939	0.0041
2178.92215	0.00388
2180.8504	0.00501
2182.77865	0.00627
2184.7069	0.00589
2186.63515	0.0048
2188.5634	0.00464
2190.49165	0.00492
2192.4199	0.00455
2194.34815	0.00424
2196.2764	0.00456
2198.20465	0.00419
2200.1329	0.00265
2202.06115	0.00149
2203.9894	0.00199
2205.91765	0.00308
2207.8459	0.00307
2209.77415	0.00273
2211.7024	0.00318
2213.63065	0.00361
2215.5589	0.00337
2217.48715	0.00279
2219.4154	0.00236
2221.34365	0.0026
2223.2719	0.00384
2225.20015	0.00575
2227.12839	0.00734
2229.05664	0.00769
2230.98489	0.00658
2232.91314	0.00467
2234.84139	0.00352
2236.76964	0.0044
2238.69789	0.0065
2240.62614	0.00812
2242.55439	0.00907
2244.48264	0.00963
2246.41089	0.00961
2248.33914	0.00915
2250.26739	0.0084
2252.19564	0.00724
2254.12389	0.00603
2256.05214	0.00568
2257.98039	0.00648
2259.90864	0.0074
2261.83689	0.00736
2263.76514	0.00677
2265.69339	0.00646
2267.62164	0.00618
2269.54989	0.00566
2271.47814	0.00525
2273.40639	0.00507
2275.33464	0.0047
2277.26289	0.00414
2279.19114	0.00389
2281.11939	0.00386
2283.04764	0.00377
2284.97589	0.00388
2286.90414	0.00454
2288.83239	0.00513
2290.76063	0.0045
2292.68888	0.00276
2294.61713	0.00107
2296.54538	0.00062
2298.47363	0.00154
2300.40188	0.00187
2302.33013	0.00018
2304.25838	-0.00221
2306.18663	-0.00355
2308.11488	-0.004
2310.04313	-0.00458
2311.97138	-0.0051
2313.89963	-0.00474
2315.82788	-0.00356
2317.75613	-0.00255
2319.68438	-0.00308
2321.61263	-0.00476
2323.54088	-0.00612
2325.46913	-0.00898
2327.39738	-0.01123
2329.32563	-0.00747
2331.25388	-0.00402
2333.18213	-0.0081
2335.11038	-0.01312
2337.03863	-0.01313
2338.96688	-0.01009
2340.89513	-0.01086
2342.82338	-0.0176
2344.75163	-0.02041
2346.67988	-0.01613
2348.60813	-0.01361
2350.53638	-0.01564
2352.46463	-0.01643
2354.39287	-0.00927
2356.32112	-0.00276
2358.24937	0.00091
2360.17762	0.00989
2362.10587	0.01088
2364.03412	-0.00334
2365.96237	-0.01588
2367.89062	-0.01833
2369.81887	-0.01769
2371.74712	-0.01557
2373.67537	-0.01144
2375.60362	-0.00724
2377.53187	-0.00352
2379.46012	-0.00058
2381.38837	0.00129
2383.31662	0.00192
2385.24487	0.00236
2387.17312	0.00429
2389.10137	0.00645
2391.02962	0.00659
2392.95787	0.00605
2394.88612	0.00663
2396.81437	0.00722
2398.74262	0.00685
2400.67087	0.00628
2402.59912	0.00591
2404.52737	0.0055
2406.45562	0.00516
2408.38387	0.00517
2410.31212	0.00601
2412.24037	0.00761
2414.16862	0.00885
2416.09686	0.00889
2418.02511	0.00853
2419.95336	0.00886
2421.88161	0.00962
2423.80986	0.01021
2425.73811	0.01011
2427.66636	0.00887
2429.59461	0.00752
2431.52286	0.00725
2433.45111	0.00736
2435.37936	0.00725
2437.30761	0.00774
2439.23586	0.00881
2441.16411	0.00899
2443.09236	0.0077
2445.02061	0.00633
2446.94886	0.00612
2448.87711	0.0062
2450.80536	0.00566
2452.73361	0.00525
2454.66186	0.00561
2456.59011	0.00618
2458.51836	0.00635
2460.44661	0.0067
2462.37486	0.00761
2464.30311	0.00799
2466.23136	0.00778
2468.15961	0.0084
2470.08786	0.00939
2472.01611	0.00916
2473.94436	0.00834
2475.87261	0.00781
2477.80086	0.00738
2479.7291	0.00745
2481.65735	0.00754
2483.5856	0.00658
2485.51385	0.00586
2487.4421	0.00643
2489.37035	0.00698
2491.2986	0.00666
2493.22685	0.00607
2495.1551	0.0059
2497.08335	0.00623
2499.0116	0.00623
2500.93985	0.00555
2502.8681	0.00497
2504.79635	0.00523
2506.7246	0.00649
2508.65285	0.00783
2510.5811	0.00792
2512.50935	0.00678
2514.4376	0.00536
2516.36585	0.00467
2518.2941	0.00473
2520.22235	0.00474
2522.1506	0.00485
2524.07885	0.00558
2526.0071	0.00637
2527.93535	0.00695
2529.8636	0.00723
2531.79185	0.00687
2533.7201	0.00632
2535.64835	0.0058
2537.5766	0.00476
2539.50485	0.00371
2541.43309	0.00362
2543.36134	0.00417
2545.28959	0.00457
2547.21784	0.00506
2549.14609	0.00564
2551.07434	0.00538
2553.00259	0.00476
2554.93084	0.00477
2556.85909	0.00468
2558.78734	0.00434
2560.71559	0.00445
2562.64384	0.00435
2564.57209	0.00339
2566.50034	0.00234
2568.42859	0.00193
2570.35684	0.00188
2572.28509	0.00173
2574.21334	0.00143
2576.14159	0.00133
2578.06984	0.00139
2579.99809	0.00136
2581.92634	0.00185
2583.85459	0.00265
2585.78284	0.00276
2587.71109	0.00243
2589.63934	0.00164
2591.56759	0.00035
2593.49584	0
2595.42409	0.00085
2597.35234	0.00196
2599.28059	0.00298
2601.20884	0.00375
2603.13709	0.00478
2605.06533	0.00686
2606.99358	0.0086
2608.92183	0.0081
2610.85008	0.00606
2612.77833	0.0047
2614.70658	0.005
2616.63483	0.00581
2618.56308	0.00597
2620.49133	0.00588
2622.41958	0.00611
2624.34783	0.00621
2626.27608	0.00571
2628.20433	0.00484
2630.13258	0.00393
2632.06083	0.00349
2633.98908	0.00363
2635.91733	0.00327
2637.84558	0.00219
2639.77383	0.00144
2641.70208	0.00183
2643.63033	0.0036
2645.55858	0.00533
2647.48683	0.00452
2649.41508	0.00171
2651.34333	0
2653.27158	0
2655.19983	0.00026
2657.12808	0.00073
2659.05633	0.00136
2660.98458	0.00152
2662.91283	0.00183
2664.84108	0.00252
2666.76932	0.00255
2668.69757	0.00193
2670.62582	0.00201
2672.55407	0.00305
2674.48232	0.00381
2676.41057	0.00393
2678.33882	0.00477
2680.26707	0.00629
2682.19532	0.00599
2684.12357	0.00396
2686.05182	0.00366
2687.98007	0.00529
2689.90832	0.00593
2691.83657	0.00527
2693.76482	0.00479
2695.69307	0.00487
2697.62132	0.00512
2699.54957	0.00472
2701.47782	0.00339
2703.40607	0.00185
2705.33432	0.0006
2707.26257	0
2709.19082	0.00043
2711.11907	0.00149
2713.04732	0.00165
2714.97557	0.00065
2716.90382	0.00023
2718.83207	0.00098
2720.76032	0.00203
2722.68857	0.00322
2724.61682	0.00415
2726.54507	0.00471
2728.47332	0.00538
2730.40156	0.00591
2732.32981	0.00618
2734.25806	0.00637
2736.18631	0.00637
2738.11456	0.00615
2740.04281	0.0054
2741.97106	0.00461
2743.89931	0.00517
2745.82756	0.00672
2747.75581	0.00764
2749.68406	0.00795
2751.61231	0.00825
2753.54056	0.00766
2755.46881	0.0055
2757.39706	0.00371
2759.32531	0.00402
2761.25356	0.00474
2763.18181	0.00432
2765.11006	0.00364
2767.03831	0.00298
2768.96656	0.00201
2770.89481	0.00141
2772.82306	0.00153
2774.75131	0.00124
2776.67956	0.00017
2778.60781	0
2780.53606	0.0015
2782.46431	0.00288
2784.39256	0.00275
2786.32081	0.00243
2788.24906	0.00369
2790.17731	0.00606
2792.10555	0.00736
2794.0338	0.00749
2795.96205	0.00855
2797.8903	0.01065
2799.81855	0.0127
2801.7468	0.01392
2803.67505	0.01362
2805.6033	0.01327
2807.53155	0.01543
2809.4598	0.02016
2811.38805	0.02517
2813.3163	0.02817
2815.24455	0.02856
2817.1728	0.02718
2819.10105	0.02498
2821.0293	0.02223
2822.95755	0.01931
2824.8858	0.01709
2826.81405	0.01594
2828.7423	0.01557
2830.67055	0.0154
2832.5988	0.01551
2834.52705	0.01694
2836.4553	0.01919
2838.38355	0.0212
2840.3118	0.02374
2842.24005	0.02612
2844.1683	0.02625
2846.09655	0.02439
2848.0248	0.02239
2849.95305	0.02178
2851.8813	0.02238
2853.80955	0.02237
2855.73779	0.02111
2857.66604	0.01911
2859.59429	0.01762
2861.52254	0.0182
2863.45079	0.01995
2865.37904	0.02058
2867.30729	0.01923
2869.23554	0.01705
2871.16379	0.0158
2873.09204	0.01499
2875.02029	0.01412
2876.94854	0.01478
2878.87679	0.01685
2880.80504	0.01868
2882.73329	0.01995
2884.66154	0.02116
2886.58979	0.02277
2888.51804	0.02537
2890.44629	0.03
2892.37454	0.03661
2894.30279	0.04434
2896.23104	0.05377
2898.15929	0.06515
2900.08754	0.07745
2902.01579	0.08964
2903.94404	0.10001
2905.87229	0.1068
2907.80054	0.10978
2909.72879	0.10992
2911.65704	0.10895
2913.58529	0.10763
2915.51354	0.10452
2917.44178	0.09914
2919.37003	0.09288
2921.29828	0.08658
2923.22653	0.08114
2925.15478	0.07759
2927.08303	0.07633
2929.01128	0.077
2930.93953	0.07754
2932.86778	0.07586
2934.79603	0.07287
2936.72428	0.07051
2938.65253	0.0687
2940.58078	0.06629
2942.50903	0.06309
2944.43728	0.05991
2946.36553	0.05723
2948.29378	0.05459
2950.22203	0.05168
2952.15028	0.04989
2954.07853	0.05056
2956.00678	0.0523
2957.93503	0.0534
2959.86328	0.05539
2961.79153	0.06052
2963.71978	0.06659
2965.64803	0.06973
2967.57628	0.07095
2969.50453	0.07197
2971.43278	0.07152
2973.36103	0.06966
2975.28928	0.06677
2977.21753	0.062
2979.14578	0.05573
2981.07402	0.04902
2983.00227	0.04251
2984.93052	0.03641
2986.85877	0.03025
2988.78702	0.02443
2990.71527	0.02008
2992.64352	0.01698
2994.57177	0.01444
2996.50002	0.01237
2998.42827	0.01065
3000.35652	0.00911
3002.28477	0.00747
3004.21302	0.00559
3006.14127	0.00411
3008.06952	0.00382
3009.99777	0.00423
3011.92602	0.00427
3013.85427	0.00378
3015.78252	0.00288
3017.71077	0.00151
3019.63902	0.00049
3021.56727	0.0004
3023.49552	0.00029
3025.42377	0
3027.35202	0.00042
3029.28027	0.00101
3031.20852	0.00099
3033.13677	0.00103
3035.06502	0.00154
3036.99327	0.00172
3038.92152	0.00127
3040.84977	0.00077
3042.77801	0.00049
3044.70626	0.00089
3046.63451	0.00196
3048.56276	0.00355
3050.49101	0.0058
3052.41926	0.00734
3054.34751	0.00708
3056.27576	0.00606
3058.20401	0.00557
3060.13226	0.00584
3062.06051	0.00594
3063.98876	0.00549
3065.91701	0.00533
3067.84526	0.00597
3069.77351	0.0067
3071.70176	0.0063
3073.63001	0.00528
3075.55826	0.00521
3077.48651	0.00579
3079.41476	0.00587
3081.34301	0.00553
3083.27126	0.00474
3085.19951	0.00351
3087.12776	0.0031
3089.05601	0.00321
3090.98426	0.00179
3092.91251	0
3094.84076	0.00011
3096.76901	0.00142
3098.69726	0.0028
3100.62551	0.004
3102.55376	0.0044
3104.48201	0.00454
3106.41025	0.00543
3108.3385	0.00622
3110.26675	0.00598
3112.195	0.00563
3114.12325	0.00607
3116.0515	0.00667
3117.97975	0.00669
3119.908	0.00671
3121.83625	0.00713
3123.7645	0.00719
3125.69275	0.00637
3127.621	0.00487
3129.54925	0.00365
3131.4775	0.00424
3133.40575	0.00609
3135.334	0.00749
3137.26225	0.00886
3139.1905	0.0098
3141.11875	0.00894
3143.047	0.00723
3144.97525	0.00628
3146.9035	0.00612
3148.83175	0.00517
3150.76	0.00297
3152.68825	0.00142
3154.6165	0.00079
3156.54475	0
3158.473	0.00075
3160.40125	0.00391
3162.3295	0.00594
3164.25775	0.0058
3166.186	0.00585
3168.11424	0.00531
3170.04249	0.00321
3171.97074	0.00206
3173.89899	0.00273
3175.82724	0.00334
3177.75549	0.0038
3179.68374	0.00491
3181.61199	0.00571
3183.54024	0.00571
3185.46849	0.00565
3187.39674	0.00542
3189.32499	0.00527
3191.25324	0.00594
3193.18149	0.00622
3195.10974	0.00531
3197.03799	0.00472
3198.96624	0.00516
3200.89449	0.00541
3202.82274	0.00418
3204.75099	0.0027
3206.67924	0.00342
3208.60749	0.00571
3210.53574	0.00754
3212.46399	0.00827
3214.39224	0.0074
3216.32049	0.00529
3218.24874	0.00459
3220.17699	0.00582
3222.10524	0.00569
3224.03349	0.00399
3225.96174	0.00353
3227.88999	0.00419
3229.81824	0.00433
3231.74648	0.00413
3233.67473	0.0044
3235.60298	0.0049
3237.53123	0.00573
3239.45948	0.00705
3241.38773	0.0075
3243.31598	0.00567
3245.24423	0.00368
3247.17248	0.0052
3249.10073	0.00849
3251.02898	0.00918
3252.95723	0.00763
3254.88548	0.00634
3256.81373	0.00601
3258.74198	0.00719
3260.67023	0.00888
3262.59848	0.00807
3264.52673	0.00459
3266.45498	0.00171
3268.38323	0.00143
3270.31148	0.003
3272.23973	0.00515
3274.16798	0.00762
3276.09623	0.00951
3278.02448	0.00885
3279.95273	0.0058
3281.88098	0.00264
3283.80923	0.00087
3285.73748	0.00103
3287.66573	0.00266
3289.59398	0.00456
3291.52223	0.00541
3293.45048	0.00394
3295.37872	0.00145
3297.30697	0.00066
3299.23522	0.00137
3301.16347	0.00217
3303.09172	0.00335
3305.01997	0.00479
3306.94822	0.00521
3308.87647	0.00464
3310.80472	0.00424
3312.73297	0.00431
3314.66122	0.00427
3316.58947	0.00408
3318.51772	0.00403
3320.44597	0.00423
3322.37422	0.005
3324.30247	0.00594
3326.23072	0.0064
3328.15897	0.0066
3330.08722	0.00686
3332.01547	0.00686
3333.94372	0.00616
3335.87197	0.0058
3337.80022	0.00633
3339.72847	0.0064
3341.65672	0.00502
3343.58497	0.0029
3345.51322	0.00174
3347.44147	0.00169
3349.36972	0.00288
3351.29797	0.005
3353.22622	0.00534
3355.15447	0.00422
3357.08271	0.00409
3359.01096	0.00503
3360.93921	0.00581
3362.86746	0.0049
3364.79571	0.00341
3366.72396	0.00412
3368.65221	0.00604
3370.58046	0.00632
3372.50871	0.00595
3374.43696	0.00693
3376.36521	0.00785
3378.29346	0.00804
3380.22171	0.00897
3382.14996	0.01011
3384.07821	0.01003
3386.00646	0.00957
3387.93471	0.00913
3389.86296	0.00718
3391.79121	0.00506
3393.71946	0.00568
3395.64771	0.0075
3397.57596	0.0079
3399.50421	0.00752
3401.43246	0.00699
3403.36071	0.00633
3405.28896	0.00689
3407.21721	0.008
3409.14546	0.00704
3411.07371	0.00517
3413.00196	0.00531
3414.93021	0.00699
3416.85846	0.00846
3418.78671	0.0091
3420.71495	0.00841
3422.6432	0.00624
3424.57145	0.00355
3426.4997	0.00217
3428.42795	0.00369
3430.3562	0.0067
3432.28445	0.00795
3434.2127	0.0075
3436.14095	0.00686
3438.0692	0.00595
3439.99745	0.00491
3441.9257	0.00445
3443.85395	0.00558
3445.7822	0.00809
3447.71045	0.00989
3449.6387	0.00996
3451.56695	0.00935
3453.4952	0.00978
3455.42345	0.01121
3457.3517	0.01171
3459.27995	0.01062
3461.2082	0.00936
3463.13645	0.00911
3465.0647	0.00932
3466.99295	0.01008
3468.9212	0.01142
3470.84945	0.01125
3472.7777	0.00986
3474.70595	0.01027
3476.6342	0.01181
3478.56245	0.01121
3480.4907	0.00909
3482.41894	0.00773
3484.34719	0.0066
3486.27544	0.00542
3488.20369	0.00555
3490.13194	0.00666
3492.06019	0.00765
3493.98844	0.00818
3495.91669	0.00747
3497.84494	0.00615
3499.77319	0.00637
3501.70144	0.00835
3503.62969	0.00992
3505.55794	0.00913
3507.48619	0.00684
3509.41444	0.00631
3511.34269	0.00932
3513.27094	0.0131
3515.19919	0.01389
3517.12744	0.01237
3519.05569	0.01186
3520.98394	0.01289
3522.91219	0.01316
3524.84044	0.01155
3526.76869	0.01038
3528.69694	0.0114
3530.62519	0.01267
3532.55344	0.01183
3534.48169	0.01041
3536.40994	0.01156
3538.33819	0.01375
3540.26644	0.01432
3542.19469	0.01434
3544.12294	0.01361
3546.05118	0.01104
3547.97943	0.00908
3549.90768	0.00972
3551.83593	0.01158
3553.76418	0.01176
3555.69243	0.00955
3557.62068	0.00822
3559.54893	0.00998
3561.47718	0.01259
3563.40543	0.01431
3565.33368	0.01437
3567.26193	0.01145
3569.19018	0.00955
3571.11843	0.01108
3573.04668	0.01169
3574.97493	0.00969
3576.90318	0.00883
3578.83143	0.01018
3580.75968	0.01204
3582.68793	0.01464
3584.61618	0.01693
3586.54443	0.01709
3588.47268	0.01676
3590.40093	0.01672
3592.32918	0.01518
3594.25743	0.01219
3596.18568	0.01115
3598.11393	0.01294
3600.04218	0.01379
3601.97043	0.01271
3603.89868	0.01188
3605.82693	0.01219
3607.75517	0.01265
3609.68342	0.01079
3611.61167	0.00802
3613.53992	0.00789
3615.46817	0.00891
3617.39642	0.00779
3619.32467	0.00565
3621.25292	0.00563
3623.18117	0.00719
3625.10942	0.00837
3627.03767	0.00755
3628.96592	0.00388
3630.89417	0.00121
3632.82242	0.00137
3634.75067	0.00189
3636.67892	0.00167
3638.60717	0.00161
3640.53542	0.00133
3642.46367	0.00035
3644.39192	0.00045
3646.32017	0.00251
3648.24842	0.00352
3650.17667	0.00167
3652.10492	0.00139
3654.03317	0.00265
3655.96142	0.00213
3657.88967	0
3659.81792	-0.00004
3661.74617	0.00206
3663.67442	0.00361
3665.60267	0.00415
3667.53092	0.00408
3669.45917	0.00356
3671.38741	0.00484
3673.31566	0.00738
3675.24391	0.00744
3677.17216	0.00435
3679.10041	0.00225
3681.02866	0.00192
3682.95691	0.00228
3684.88516	0.0032
3686.81341	0.00414
3688.74166	0.0044
3690.66991	0.00469
3692.59816	0.00473
3694.52641	0.00392
3696.45466	0.00282
3698.38291	0.00194
3700.31116	0.00165
3702.23941	0.00163
3704.16766	0.00099
3706.09591	0.00021
3708.02416	0
3709.95241	-0.00005
3711.88066	0.00031
3713.80891	0.00144
3715.73716	0.00254
3717.66541	0.00334
3719.59366	0.00405
3721.52191	0.00465
3723.45016	0.0044
3725.37841	0.00357
3727.30666	0.00384
3729.23491	0.00587
3731.16316	0.008
3733.0914	0.00765
3735.01965	0.00511
3736.9479	0.00359
3738.87615	0.00398
3740.8044	0.00468
3742.73265	0.00342
3744.6609	0.0011
3746.58915	0.00217
3748.5174	0.00464
3750.44565	0.00486
3752.3739	0.00392
3754.30215	0.00354
3756.2304	0.00241
3758.15865	0.00047
3760.0869	0
3762.01515	0.00148
3763.9434	0.0034
3765.87165	0.00543
3767.7999	0.00656
3769.72815	0.00615
3771.6564	0.00599
3773.58465	0.00647
3775.5129	0.00682
3777.44115	0.00657
3779.3694	0.00534
3781.29765	0.00493
3783.2259	0.00579
3785.15415	0.0054
3787.0824	0.00373
3789.01065	0.00327
3790.9389	0.00416
3792.86715	0.00461
3794.7954	0.00386
3796.72364	0.00304
3798.65189	0.00329
3800.58014	0.00346
3802.50839	0.00331
3804.43664	0.004
3806.36489	0.00383
3808.29314	0.0024
3810.22139	0.00248
3812.14964	0.00419
3814.07789	0.00548
3816.00614	0.00475
3817.93439	0.00257
3819.86264	0.00058
3821.79089	0.00034
3823.71914	0.0012
3825.64739	0.0009
3827.57564	0.0003
3829.50389	0.00118
3831.43214	0.00245
3833.36039	0.00355
3835.28864	0.00518
3837.21689	0.00586
3839.14514	0.00503
3841.07339	0.00448
3843.00164	0.00406
3844.92989	0.00309
3846.85814	0.00263
3848.78639	0.00357
3850.71464	0.00499
3852.64289	0.0045
3854.57114	0.00165
3856.49939	0
3858.42763	0.00014
3860.35588	0.00114
3862.28413	0.00209
3864.21238	0.00278
3866.14063	0.00328
3868.06888	0.00363
3869.99713	0.00398
3871.92538	0.00375
3873.85363	0.00286
3875.78188	0.00256
3877.71013	0.00296
3879.63838	0.0033
3881.56663	0.00372
3883.49488	0.00345
3885.42313	0.00158
3887.35138	0.00074
3889.27963	0.00182
3891.20788	0.00203
3893.13613	0.00165
3895.06438	0.00204
3896.99263	0.0018
3898.92088	0.00134
3900.84913	0.0024
3902.77738	0.00405
3904.70563	0.00467
3906.63388	0.00446
3908.56213	0.00418
3910.49038	0.00375
3912.41863	0.00278
3914.34688	0.00191
3916.27513	0.00243
3918.20338	0.00381
3920.13163	0.00448
3922.05987	0.00448
3923.98812	0.00373
3925.91637	0.00219
3927.84462	0.00135
3929.77287	0.00216
3931.70112	0.00367
3933.62937	0.00407
3935.55762	0.0032
3937.48587	0.00248
3939.41412	0.00288
3941.34237	0.00405
3943.27062	0.00466
3945.19887	0.00381
3947.12712	0.00293
3949.05537	0.00346
3950.98362	0.00439
3952.91187	0.00409
3954.84012	0.00293
3956.76837	0.00309
3958.69662	0.00494
3960.62487	0.0061
3962.55312	0.00509
3964.48137	0.00285
3966.40962	0.00131
3968.33787	0.00061
3970.26612	0
3972.19437	0.00056
3974.12262	0.00279
3976.05087	0.00421
3977.97912	0.00322
3979.90737	0.00165
3981.83562	0.00127
3983.76386	0.0017
3985.69211	0.00217
3987.62036	0.00276
3989.54861	0.00399
3991.47686	0.00551
3993.40511	0.00586
3995.33336	0.00445
3997.26161	0.00299
3999.18986	0.00249
4001.11811	0.00154
