# Supplementary material
Source: publisher figshare collection journal article supplement (https://sage.figshare.com/ndownloader/files/24745414)
Supplement: Supplementary file 1 [file 24745414 › ESM2_revised.xlsx]

## Sheet: Tabelle1
	All Particles	Synthectic particles	Percentage	polyethylene	polyethylene oxidized	polyethylene-chlorinated	polypropylene	polystyrene	polycarbonate	polyamide	polyvinylchloride	cellulose chemical modified	nitrile rubber	polyester	acrylates/PUR/varnish	animal fur	plant fibres	sand	polysulfone	polyetheretherketon	polychloroprene	chitin	polyisoprene chlorinated	polylactide acide	polycaprolactone	ethylene-vinyl-acetate	polyimide	polyoxymethylene	polybutadiene	acrylonitrile-butadiene	rubber type 1	rubber type 2	charcoal	coal	rubber type 3	Size class polymers Single pixel	Size class polymers Single pixel - 25 µm	Size class polymers 25 - 50 µm	Size class polymers 50- 75 µm	Size class polymers 75 - 100 µm	Size class polymers 100 - 125 µm	Size class polymers 125 - 150 µm	Size class polymers 150 - 175 µm	Size class polymers 175 - 200 µm	Size class polymers 200 - 225 µm	Size class polymers 225 - 250 µm	Size class polymers 250 - 275 µm	Size class polymers 275 - 300 µm	Size class polymers 300 - 325 µm
ID	N	N	%	N	N	N	N	N	N	N	N	N	N	N	N	N	N	N	N	N	N	N	N	N	N	N	N	N	N	N	N	N	N	N	N	N	N	N	N	N	N	N	N	N	N	N	N	N	N
1	1889	61	3.22922	0	0	2	2	1	0	1	0	0	22	3	17	319	1107	3	0	0	8	394	0	0	2	2	0	0	0	1	0	0	0	5	0	44	0	6	3	4	2	1	0	1	0	0	0	0	0
2	3484	466	13.3754	4	0	27	2	3	0	6	22	0	9	21	287	101	2825	2	0	5	0	3	0	0	41	15	0	1	0	0	1	0	14	73	22	173	230	47	12	3	0	1	0	0	0	0	0	0	0
3	8930	2315	25.9239	218	0	75	335	4	0	115	2	10	1	73	1200	3630	2352	587	0	0	3	46	0	2	29	19	0	4	0	0	0	0	0	0	225	1047	604	402	128	67	29	13	6	4	2	3	1	2	1
4	210	20	9.52381	4	0	10	2	0	0	0	0	0	1	0	0	54	65	67	0	0	0	3	0	0	0	0	0	0	0	0	0	0	1	0	3	5	0	5	4	2	2	2	0	0	0	0	0	0	0
[truncated: 36 more columns]
